# Supplementary material
Source: MDPI journal article supplement (https://www.mdpi.com/2079-6412/12/10/1448)
Supplement: s1 [file s1]

# Highly Efficient CuInSe<sub>2</sub> Sensitized TiO<sub>2</sub> Nanotube Films for Photocathodic Protection of 316 Stainless Steel

Zhanyuan Yang <sup>1</sup>, Hong Li <sup>1,2,\*</sup>, Xingqiang Cui <sup>1</sup>, Jinke Zhu <sup>1</sup>, Yanhui Li <sup>1,2</sup>, Pengfei Zhang <sup>1</sup> and Junru Li <sup>1</sup>

<sup>1</sup> College of Mechanical and Electrical Engineering, Qingdao University, Qingdao 266071, China

<sup>2</sup> State Key Laboratory of Bio-Fibers and Eco-Textiles, Qingdao University, Qingdao 266071, China

\* Correspondence: lhqdio1987@163.com; Tel.: +86-532-8595-3679

## Computational methods

All calculations were carried out using the Vienna Ab-initio Simulation Package (Vasp). The Perdew-Burke-Ernzerhof (PBE) formula of the generalized gradient approximation (GGA) was adopted to describe the exchange-correlation effects. All calculations were carried out with a set cutoff energy (400 eV) and self-consistent convergence accuracy ( $1 \times 10^{-5}$  eV). The k-point meshes were set as  $3 \times 1 \times 1$  of the TiO<sub>2</sub> and CuInSe<sub>2</sub>. The convergence criterion of the force between atoms and the maximum displacement are 0.03 eV/Å and 0.001 Å, respectively.
